# Supplementary material for: Repurposing a traditional Japanese method of pest control for wintering pine moths, Komo-trap, for use against summer and winter populations of fall webworms
Source: PeerJ. 2020 Jun 2;8:e9244. doi: 10.7717/peerj.9244 (PMC7274166; doi:10.7717/peerj.9244)
Supplement: Supplemental Information 1 [file peerj-08-9244-s001.xlsx]

## Sheet: Table heading
Total ID	Season ID	Season	Street	Tree Species (English name)	Tree Species (Scientific name)	date_Komo installation	date_Komo removal	DBH(cm)	FFW	FFW_Pupa	FFW_Pre-pupa	FFW_Male	FFW_Female	FFW_Unidentifiable	Spider	Woodlouse	Centipede	Millipede	Earwig	Stink bug	Weevil	Moth	Cockroach	Fly larva
								Diameter at breast height (1.3 m above ground).	No. of fall webworms captured by the komo-trap			No. of males or females of FFW_Pupae			No. of individuals of other species captured by the komo-trap
									a+b+c+d	b+c+d	a	b	c	d

## Sheet: Summer
Total ID	Season ID	Season	Street	Tree Species (English name)	Tree Species (Scientific name)		date_Komo installation	date_Komo removal	DBH(cm)	FFW	FFW_Pupa	FFW_Pre-pupa	FFW_Male	FFW_Female	FFW_Unidentifiable	Spider	Woodlouse	Centipede	Millipede	Earwig	Stink bug	Weevil	Moth	Cockroach	Fly larva
S_01	1	Summer	Hachiman street	American sycamore	Platanus occidentalis		20170724	20170803	33.121	32	28	4	14	14	0	1	0	0	0	0	0	0	0	0	0
S_02	2	Summer	Hachiman street	American sycamore	Platanus occidentalis		20170724	20170803	32.1656	0	0	0	0	0	0	0	0	0	0	0	0	0	0	0	0
S_03	3	Summer	Hachiman street	American sycamore	Platanus occidentalis		20170724	20170803	20.0637	0	0	0	0	0	0	1	0	0	0	0	0	0	1	0	0
S_04	4	Summer	R571	Japanese Rowan	Sorbus commixta		20170724	20170803	10.5096	6	4	2	2	2	0	1	0	0	0	1	1	1	0	0	0
S_05	5	Summer	R571	Japanese Rowan	Sorbus commixta		20170724	20170803	27.707	0	0	0	0	0	0	0	0	0	0	0	0	2	0	0	0
S_06	6	Summer	R571	Japanese Rowan	Sorbus commixta		20170724	20170803	21.0191	1	1	0	0	1	0	0	0	0	0	1	0	0	0	0	0
S_07	7	Summer	R571	Japanese Rowan	Sorbus commixta		20170725	20170804	18.7898	73	73	0	10	62	1	0	0	0	0	0	0	0	0	0	0
S_08	8	Summer	R571	Japanese Rowan	Sorbus commixta		20170725	20170804	7.64331	0	0	0	0	0	0	0	0	0	0	0	0	0	0	0	0
S_09	9	Summer	Hachiman street	Manchurian Ash	Fraxinus mandshurica var. japonica		20170725	20170804	41.4013	0	0	0	0	0	0	0	0	0	0	0	0	0	0	0	0
S_10	10	Summer	Hachiman street	Manchurian Ash	Fraxinus mandshurica var. japonica		20170725	20170804	42.0382	0	0	0	0	0	0	1	0	0	0	0	0	0	0	0	0
S_11	11	Summer	Hachiman street	Manchurian Ash	Fraxinus mandshurica var. japonica		20170725	20170804	45.8599	15	15	0	8	6	1	0	0	0	0	0	0	0	0	0	0
S_12	12	Summer	Hachiman street	Manchurian Ash	Fraxinus mandshurica var. japonica		20170725	20170804	43.949	2	1	1	0	1	0	1	0	0	0	0	0	0	0	0	0
S_13	13	Summer	Hachiman street	Manchurian Ash	Fraxinus mandshurica var. japonica		20170725	20170804	56.3694	45	40	5	8	32	0	0	0	0	1	0	0	0	0	0	1
S_14	14	Summer	Hachiman street	Manchurian Ash	Fraxinus mandshurica var. japonica		20170725	20170804	34.7134	0	0	0	0	0	0	0	0	0	0	0	0	0	0	0	0
S_15	15	Summer	Hachiman street	Manchurian Ash	Fraxinus mandshurica var. japonica		20170725	20170804	41.7197	1	0	1	0	0	0	0	0	0	0	10	0	0	0	0	0
S_16	16	Summer	Hachiman street	Manchurian Ash	Fraxinus mandshurica var. japonica		20170725	20170804	38.535	1	1	0	0	1	0	0	0	0	0	0	0	0	0	1	0
S_17	17	Summer	Hachiman street	Manchurian Ash	Fraxinus mandshurica var. japonica		20170725	20170804	34.7134	172	171	1	69	102	0	0	0	0	0	0	0	0	0	0	0
S_18	18	Summer	R347	Japanese Rowan	Sorbus commixta		20170726	20170807	13.6943	98	98	0	8	88	2	0	0	0	0	0	0	0	0	0	0
S_19	19	Summer	R347	Japanese Rowan	Sorbus commixta		20170726	20170807	31.5287	12	12	0	0	11	1	0	0	0	0	0	0	0	0	0	0
S_20	20	Summer	Hachiman street	Manchurian Ash	Fraxinus mandshurica var. japonica		20170725	20170804	35.6688	1	1	0	0	1	0	0	0	0	0	2	0	0	0	0	0
S_21	21	Summer	Shinko street	American sycamore	Platanus occidentalis		20170726	20170807	30.8917	242	237	5	70	166	1	0	0	0	0	0	0	0	0	0	0
S_22	22	Summer	Shinko street	American sycamore	Platanus occidentalis		20170726	20170807	36.6242	151	138	13	66	72	0	0	0	0	0	0	0	0	0	0	0
S_23	23	Summer	Tokiwa street	American sycamore	Platanus occidentalis		20170726	20170807	32.1656	0	0	0	0	0	0	0	0	0	0	0	0	0	0	0	0
S_24	24	Summer	Tokiwa street	American sycamore	Platanus occidentalis		20170726	20170807	32.1656	2	2	0	2	0	0	0	0	0	0	0	0	0	0	0	0
S_25	25	Summer	Tokiwa street	American sycamore	Platanus occidentalis		20170726	20170807	29.9363	14	9	5	3	6	0	0	0	0	0	0	0	0	0	0	0
S_26	26	Summer	Tokiwa street	American sycamore	Platanus occidentalis		20170726	20170807	31.5287	9	9	0	1	8	0	0	1	0	0	0	0	0	0	0	0
S_27	27	Summer	Tokiwa street	American sycamore	Platanus occidentalis		20170726	20170807	31.8471	157	147	10	59	88	0	0	0	1	0	0	0	0	0	0	1
S_28	28	Summer	Shinko street	American sycamore	Platanus occidentalis		20170726	20170807	36.9427	31	31	0	2	29	0	0	0	0	0	0	0	0	0	0	0
S_29	29	Summer	Goryoukaku street	Japanese Rowan	Sorbus commixta		20170726	20170807	16.242	57	57	0	3	54	0	0	0	0	0	0	0	0	0	0	0
S_30	30	Summer	Goryoukaku street	Japanese Rowan	Sorbus commixta		20170727	20170808	25.7962	16	11	5	6	5	0	0	0	1	0	0	0	0	0	0	0
S_31	31	Summer	Goryoukaku street	Japanese Rowan	Sorbus commixta		20170727	20170808	30.8917	9	5	4	1	4	0	0	0	1	0	0	0	0	0	0	0
S_32	32	Summer	Tokiwa street	American sycamore	Platanus occidentalis		20170726	20170807	29.9363	43	9	34	2	7	0	0	0	0	0	0	0	0	0	0	0
S_33	33	Summer	R571	Japanese Rowan	Sorbus commixta		20170727	20170808	25.1592	0	0	0	0	0	0	0	0	0	0	0	0	0	0	0	0
S_34	34	Summer	Goryoukaku street	Japanese Rowan	Sorbus commixta		20170727	20170808	22.6115	1	1	0	0	1	0	0	0	0	0	0	0	0	0	0	0
S_35	35	Summer	Goryoukaku street	Japanese Rowan	Sorbus commixta		20170727	20170808	24.8408	1	1	0	0	1	0	0	0	0	0	0	0	0	0	0	0
S_36	36	Summer	Goryoukaku street	Japanese Rowan	Sorbus commixta		20170727	20170808	26.7516	5	5	0	2	3	0	0	0	0	0	0	2	0	0	0	0
S_37	37	Summer	Goryoukaku street	Japanese Rowan	Sorbus commixta		20170727	20170808	33.121	167	167	0	26	141	0	0	0	0	0	0	0	0	0	0	9
S_38	38	Summer	Goryoukaku street	Japanese Rowan	Sorbus commixta		20170727	20170808	29.6178	28	27	1	10	16	1	0	0	0	0	0	0	0	0	0	0
S_39	39	Summer	Goryoukaku street	Japanese Rowan	Sorbus commixta		20170727	20170808	28.0255	27	27	0	17	10	0	0	0	0	0	0	0	0	0	0	0
S_40	40	Summer	Goryoukaku street	Japanese Rowan	Sorbus commixta		20170727	20170808	20.0637	154	149	5	88	61	0	0	0	0	0	0	0	0	0	0	1
S_41	41	Summer	Goryoukaku street	Japanese Rowan	Sorbus commixta		20170727	20170808	32.8025	132	118	14	83	34	1	0	0	0	0	0	0	0	0	0	0
S_42	42	Summer	Goryoukaku street	Japanese Rowan	Sorbus commixta		20170727	20170808	35.3503	132	123	9	80	43	0	0	0	0	0	0	0	0	0	0	0
S_43	43	Summer	Goryoukaku street	Japanese Rowan	Sorbus commixta		20170727	20170808	31.2102	45	28	17	10	17	1	0	0	0	0	0	0	0	0	0	0

## Sheet: Fall
Total ID	Season ID	Season	Street	Tree Species (English name)	Tree Species (Scientific name)	date_Komo installation	date_Komo removal	DBH(cm)	FFW	FFW_Pupa	FFW_Pre-pupa	FFW_Male	FFW_Female	FFW_Unidentifiable	Spider	Woodlouse	Centipede	Millipede	Earwig	Stink bug	Weevil	Moth	Cockroach	Fly larva
F_01	1	Fall	Hachiman street	American sycamore	Platanus occidentalis	20170924	20171031	30.5732	6	1	5	0	1	0	0	1	0	0	0	0	0	0	0	0
F_02	2	Fall	Hachiman street	American sycamore	Platanus occidentalis	20170924	20171031	25.4777	20	14	6	6	6	2	1	0	0	0	0	0	0	0	0	0
F_03	3	Fall	Hachiman street	American sycamore	Platanus occidentalis	20170924	20171031	23.5669	24	7	17	6	1	0	0	0	0	0	0	0	0	0	0	0
F_04	4	Fall	Hachiman street	American sycamore	Platanus occidentalis	20170924	20171031	22.293	32	13	19	10	3	0	0	32	0	0	0	0	0	0	0	0
F_05	5	Fall	Hachiman street	American sycamore	Platanus occidentalis	20170924	20171031	32.8025	3	1	2	1	0	0	0	0	0	0	0	0	0	0	0	0
F_06	6	Fall	Hachiman street	American sycamore	Platanus occidentalis	20170924	20171031	30.2548	8	3	5	2	1	0	0	21	0	0	0	0	0	0	0	0
F_07	7	Fall	Hachiman street	American sycamore	Platanus occidentalis	20170924	20171031	24.5223	21	8	13	2	6	0	0	0	0	0	0	0	0	0	0	0
F_08	8	Fall	Hachiman street	American sycamore	Platanus occidentalis	20170924	20171031	26.1146	14	4	10	3	1	0	0	0	1	0	0	0	0	0	0	0
F_09	9	Fall	Hachiman street	American sycamore	Platanus occidentalis	20170924	20171031	31.8471	7	0	7	0	0	0	0	0	0	0	0	0	0	0	0	0
F_10	10	Fall	Hachiman street	American sycamore	Platanus occidentalis	20170924	20171031	20.3822	11	0	11	0	0	0	2	0	0	0	0	0	0	0	0	0
F_11	11	Fall	Hachiman street	American sycamore	Platanus occidentalis	20170924	20171031	26.4331	9	0	9	0	0	0	0	0	0	0	0	0	0	0	0	0
F_12	12	Fall	Hachiman street	American sycamore	Platanus occidentalis	20170924	20171031	27.707	6	1	5	0	1	0	0	0	0	0	0	0	0	0	0	0
F_13	13	Fall	Hachiman street	American sycamore	Platanus occidentalis	20170924	20171031	25.4777	12	4	8	4	0	0	1	31	0	0	0	0	0	0	0	0
F_14	14	Fall	Hachiman street	American sycamore	Platanus occidentalis	20170924	20171031	30.2548	5	1	4	1	0	0	1	0	0	0	0	0	0	0	0	0
F_15	15	Fall	Hachiman street	American sycamore	Platanus occidentalis	20170924	20171031	17.5159	12	0	12	0	0	0	0	0	0	0	0	0	0	0	0	0
F_16	16	Fall	Hachiman street	American sycamore	Platanus occidentalis	20170924	20171031	34.3949	1	0	1	0	0	0	0	0	0	0	0	0	0	0	0	0
F_17	17	Fall	Hachiman street	American sycamore	Platanus occidentalis	20170924	20171031	26.1146	0	0	0	0	0	0	1	0	0	0	0	0	0	0	0	0
F_24	24	Fall	R347	Japanese Rowan	Sorbus commixta	20170926	20171102	14.9682	8	5	3	3	2	0	0	0	0	0	0	0	0	0	0	0
F_18	18	Fall	Hachiman street	Manchurian Ash	Fraxinus mandshurica var. japonica	20170926	20171102	48.7261	85	63	22	37	26	0	0	0	0	0	0	0	0	0	0	0
F_19	19	Fall	Hachiman street	Manchurian Ash	Fraxinus mandshurica var. japonica	20170926	20171102	38.2166	102	80	22	39	40	1	0	54	0	0	0	0	0	0	0	0
F_20	20	Fall	Hachiman street	Manchurian Ash	Fraxinus mandshurica var. japonica	20170926	20171102	39.172	31	29	2	18	11	0	0	14	0	0	0	0	0	0	0	0
F_21	21	Fall	Hachiman street	Manchurian Ash	Fraxinus mandshurica var. japonica	20170926	20171102	43.3121	63	41	22	24	16	1	6	0	0	0	0	0	0	0	0	0
F_22	22	Fall	Hachiman street	Manchurian Ash	Fraxinus mandshurica var. japonica	20170926	20171102	41.7197	99	71	28	37	32	2	0	0	0	0	0	0	0	0	0	0
F_23	23	Fall	Hachiman street	Manchurian Ash	Fraxinus mandshurica var. japonica	20170926	20171102	44.586	44	27	17	16	11	0	0	0	0	0	0	0	0	0	0	0
F_26	26	Fall	Hachiman street	Manchurian Ash	Fraxinus mandshurica var. japonica	20170926	20171102	36.3057	48	30	18	8	22	0	0	18	0	0	0	0	0	0	0	0
F_27	27	Fall	Hachiman street	Manchurian Ash	Fraxinus mandshurica var. japonica	20170926	20171102	35.6688	20	8	12	0	8	0	0	66	0	0	0	0	0	0	0	0
F_28	28	Fall	Hachiman street	Manchurian Ash	Fraxinus mandshurica var. japonica	20170926	20171102	45.2229	21	14	7	2	12	0	0	33	0	0	0	0	0	0	0	0
F_29	29	Fall	Hachiman street	Manchurian Ash	Fraxinus mandshurica var. japonica	20170926	20171102	38.535	9	6	3	2	4	0	0	0	0	0	0	0	0	0	0	0
F_30	30	Fall	Hachiman street	Manchurian Ash	Fraxinus mandshurica var. japonica	20170926	20171102	33.4395	3	2	1	2	0	0	0	0	0	0	0	0	0	0	0	0
F_31	31	Fall	Hachiman street	Manchurian Ash	Fraxinus mandshurica var. japonica	20170926	20171102	38.2166	35	22	13	1	21	0	0	0	0	0	0	0	0	0	0	0
F_32	32	Fall	Hachiman street	Manchurian Ash	Fraxinus mandshurica var. japonica	20170926	20171102	34.7134	3	2	1	0	2	0	0	0	0	0	0	0	0	0	0	0
F_33	33	Fall	Hachiman street	Manchurian Ash	Fraxinus mandshurica var. japonica	20170926	20171102	37.5796	59	40	19	6	34	0	0	14	0	0	0	0	0	0	0	0
F_34	34	Fall	Hachiman street	Manchurian Ash	Fraxinus mandshurica var. japonica	20170926	20171102	39.8089	87	65	22	25	40	0	0	25	0	0	0	0	0	0	0	0
F_25	25	Fall	R347	Japanese Rowan	Sorbus commixta	20170927	20171106	29.9363	59	52	7	27	25	0	0	134	0	0	0	0	0	0	0	0
F_35	35	Fall	Goryoukaku street	Japanese Rowan	Sorbus commixta	20170927	20171106	35.3503	23	5	18	3	2	0	0	0	0	0	1	0	0	0	0	0
F_36	36	Fall	Goryoukaku street	Japanese Rowan	Sorbus commixta	20170927	20171106	23.5669	35	5	30	1	4	0	0	0	0	0	0	1	0	0	0	0
F_37	37	Fall	Goryoukaku street	Japanese Rowan	Sorbus commixta	20170927	20171106	26.4331	16	7	9	4	3	0	0	0	0	0	0	0	0	0	0	3
F_38	38	Fall	Goryoukaku street	Japanese Rowan	Sorbus commixta	20170927	20171106	25.4777	7	2	5	0	2	0	1	33	0	0	0	0	0	0	0	0
F_39	39	Fall	Goryoukaku street	Japanese Rowan	Sorbus commixta	20170927	20171106	31.8471	6	0	6	0	0	0	0	0	0	0	0	0	0	0	0	0
F_40	40	Fall	R571	Japanese Rowan	Sorbus commixta	20170927	20171106	16.879	2	0	2	0	0	0	0	0	0	0	0	0	0	0	0	0
F_41	41	Fall	R571	Japanese Rowan	Sorbus commixta	20170927	20171106	12.4204	4	0	4	0	0	0	0	0	0	0	0	0	0	0	0	0
F_42	42	Fall	R571	Japanese Rowan	Sorbus commixta	20170927	20171106	10.1911	0	0	0	0	0	0	0	0	0	0	0	0	0	0	0	0
F_43	43	Fall	R571	Japanese Rowan	Sorbus commixta	20170927	20171106	11.7834	0	0	0	0	0	0	0	0	0	0	0	0	0	0	0	0
F_44	44	Fall	R571	Japanese Rowan	Sorbus commixta	20170927	20171106	21.0191	4	1	3	1	0	0	0	0	0	0	0	0	0	0	0	0
F_48	48	Fall	Shinko street	American sycamore	Platanus occidentalis	20170927	20171107	29.2994	9	5	4	0	5	0	0	0	0	0	0	0	0	0	0	0
F_49	49	Fall	Shinko street	American sycamore	Platanus occidentalis	20170927	20171107	31.5287	0	0	0	0	0	0	0	0	0	0	0	0	0	0	0	0
F_50	50	Fall	Shinko street	American sycamore	Platanus occidentalis	20170927	20171107	28.0255	0	0	0	0	0	0	0	0	0	0	0	0	0	0	0	0
F_45	45	Fall	Hachiman street	Manchurian Ash	Fraxinus mandshurica var. japonica	20170927	20171107	42.3567	66	49	17	29	18	2	0	5	0	0	0	0	0	0	0	0
F_46	46	Fall	Hachiman street	Manchurian Ash	Fraxinus mandshurica var. japonica	20170927	20171107	35.6688	53	43	10	17	26	0	1	4	0	0	0	0	0	0	0	0
F_47	47	Fall	Hachiman street	Manchurian Ash	Fraxinus mandshurica var. japonica	20170927	20171107	41.0828	100	87	13	49	38	0	0	49	0	0	0	0	0	0	0	0
